# Supplementary material
Source: PubMed Central journal article supplement (PMC4898195)
Supplement: NIHMS781980-supplement-Supplemental_material.pdf [file NIHMS781980-supplement-Supplemental_material.pdf]

**Electronic Supplementary Material**

**Indirect detection of superoxide in RAW 264.7 macrophage cells using  
microchip electrophoresis coupled to laser induced fluorescence**

Richard P. S. de Campos, Joseph M. Siegel, Claudia G. Fresta, Giuseppe Caruso,

José A. F. da Silva, Susan M. Lunte

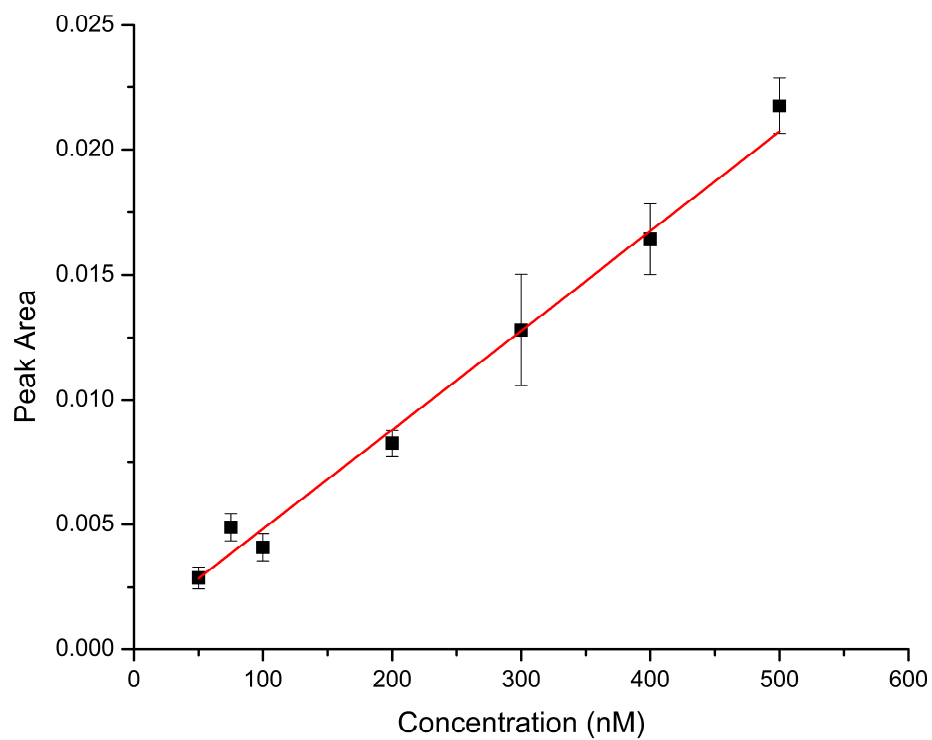

**Fig. S1** Calibration curve for 2-OH-MitoE<sup>+</sup> obtained from the reaction between MitoHE and NDS.  $R^2 = 0.97$ .  $y = 8.6 \times 10^{-4} + (4.0 \times 10^{-5}) x$

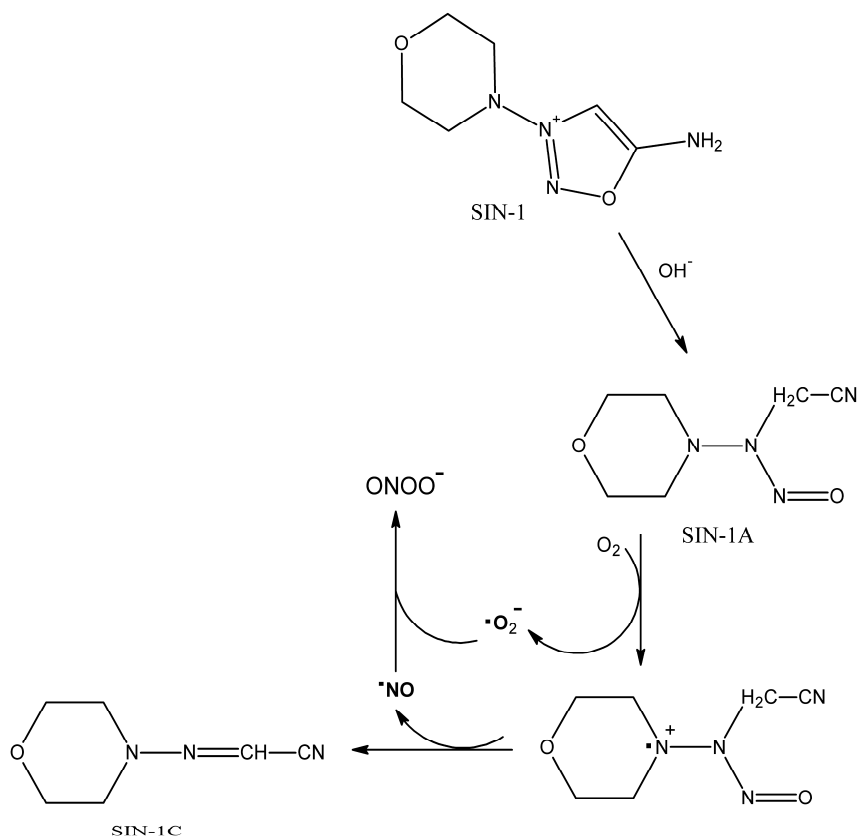

**Fig. S2** SIN-1 decomposition in presence of  $\text{OH}^-$ . The reaction generates NO and superoxide that will react to form peroxynitrite. Once inside a cell, eteases can also trigger a similar reaction pathway, producing SIN-1C and the byproducts nitric oxide, superoxide and peroxynitrite. Reproduced from Hulvey *et al.* [33]

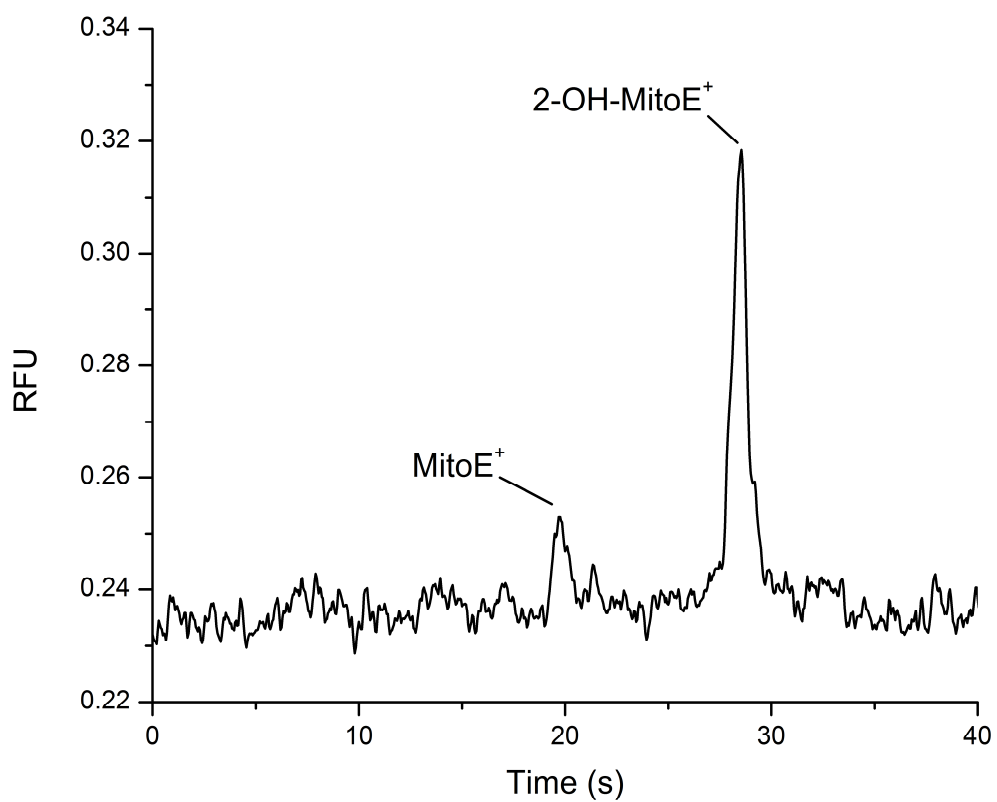

**Fig. S3** Bulk cell lysate analysis of 24 h PMA stimulated RAW 264.7 in the presence of both DDC and 2ME inhibitors. Run showing the separation both MitoE<sup>+</sup> and in 2-OH-MitoE<sup>+</sup> peaks produced due to prolonged reaction between free MitoHE with oxidizing species other than superoxide or due to probe auto-oxidation
